# Supplementary material for: Band engineering and crystal field screening in thermoelectric Mg3Sb2
Source: Royal Society of Chemistry journal article supplement (doi:10.1039/c9ta00288j), 2019-01-01
Supplement: c9ta00288j1.pdf [file c9ta00288j1.pdf]

Supporting Information

## Band engineering and crystal field screening in thermoelectric $\text{Mg}_3\text{Sb}_2$

Xiaojian Tan<sup>1,2</sup>, Guoqiang Liu<sup>1,2,\*</sup>, Haoyang Hu<sup>1</sup>, Hezhu Shao<sup>1,2</sup>, Jingtao Xu<sup>1,2</sup>, and Jun Jiang<sup>1,2,\*</sup>

<sup>1</sup>Ningbo Institute of Materials Technology and Engineering, Chinese Academy of Sciences, Ningbo 315201, China;

<sup>2</sup>Center of Materials Science and Optoelectronics Engineering, University of Chinese Academy of Sciences, Beijing 100049, China;

E-mail: liugq@nimte.ac.cn, jjun@nimte.ac.cn

### S1. Band structure

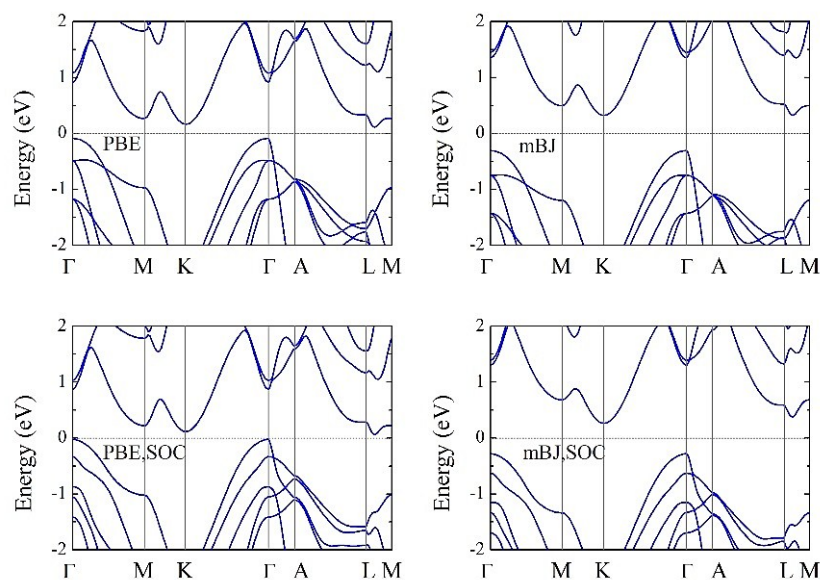

Figure S1. The calculated band structure for  $\text{Mg}_3\text{Sb}_2$  by using PBE and mBJ functional, without and with spin-orbit coupling (SOC) effect.

### S2. First Brillouin zone

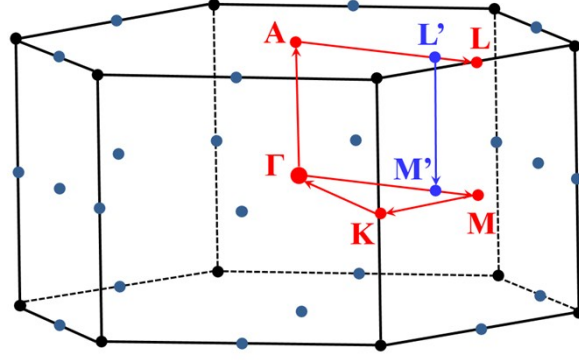

Figure S2. The high symmetry points in the first Brillouin zone of  $\text{Mg}_3\text{Sb}_2$ , and the  $k$ -path along  $\Gamma$ -M-K- $\Gamma$ -A-L and  $L'(0, 0.417, 0.5)$  to  $M'(0, 0.417, 0)$  are shown.

### S3. Band convergence in shrunken $\text{Mg}_3\text{Sb}_2$

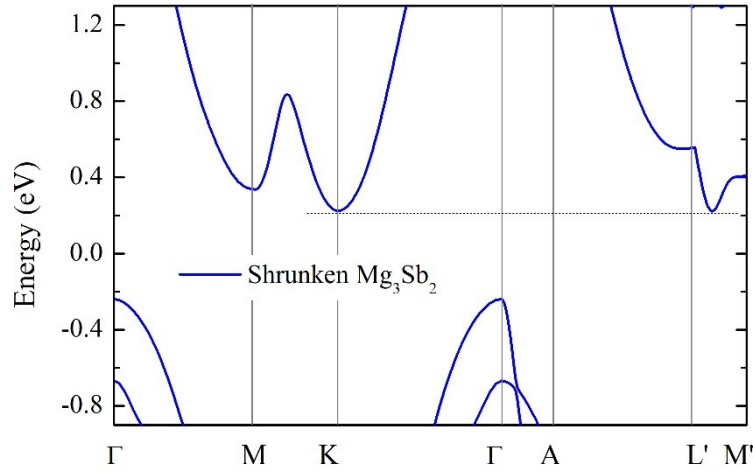

Figure S3. Calculated band structure of shrunken  $\text{Mg}_3\text{Sb}_2$ , and a complete conduction band convergence is achieved.

### S4. Band effective mass

Based on the band dispersion of density functional calculations, the effective mass tensor  $m_{ij}^*$  of band edge can be determined by

$$m_{ij}^* = \frac{\hbar^2}{\partial^2 E(k) / \partial k_i \partial k_j}$$

For the anisotropic  $\text{Mg}_3\text{Sb}_2$ , the band effective mass then can be calculated by

$$m_b^* = \sqrt[3]{m_{xx}^* m_{yy}^* m_{zz}^*}$$

The calculated band effective masses and DOS effective masses for the first VBM of Ba-doped  $\text{Mg}_3\text{Sb}_2$  are summarized in Table S1.

| Ba content | $m_{xx}^*/m_{yy}^*$ ( $m_e$ ) | $m_{zz}^*$ ( $m_e$ ) | $m_b^*$ ( $m_e$ ) |
|------------|-------------------------------|----------------------|-------------------|
| 0.0        | 1.143                         | 0.136                | 0.562             |
| 0.125      | 1.079                         | 0.131                | 0.534             |
| 0.25       | 1.014                         | 0.127                | 0.507             |
| 0.375      | 0.926                         | 0.129                | 0.480             |

### S5. Local structure of Ba-doped $\text{Mg}_3\text{Sb}_2$

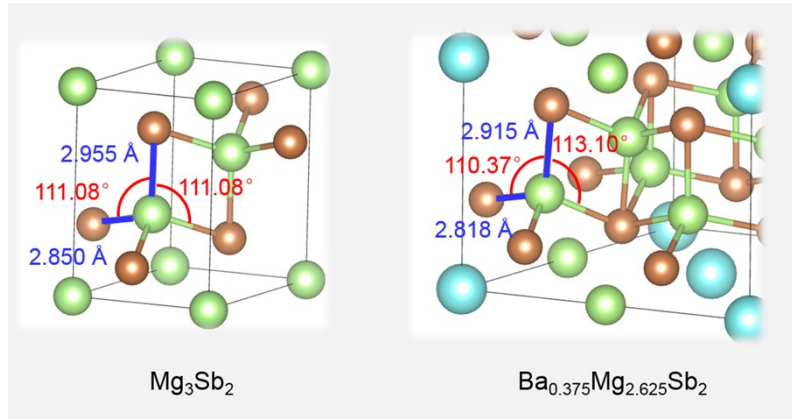

Figure S4. When doping Ba into  $\text{Mg}_3\text{Sb}_2$ , the local structure is little bit changed. Take  $\text{Ba}_{0.375}\text{Mg}_{2.625}\text{Sb}_2$  for example, the lattice parameter  $a$  increases mildly (from 4.606 to 4.690 Å) while  $c$  increases significantly (from 7.248 to 7.677 Å) relative to pristine  $\text{Mg}_3\text{Sb}_2$ .

### S6. Hole mobility

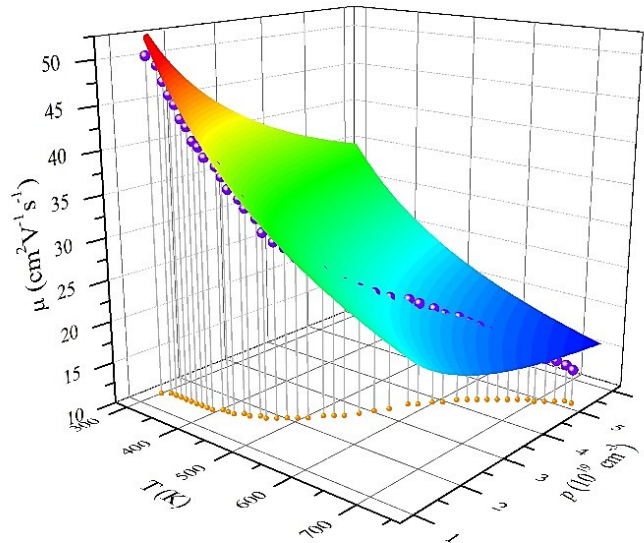

Figure S5. The fitted hole mobility as a function of hole concentration and temperature for  $p$ -type  $\text{Mg}_3\text{Sb}_2$ , and the experimental results[S1] are also shown for comparison.

## S7. Lattice thermal conductivity

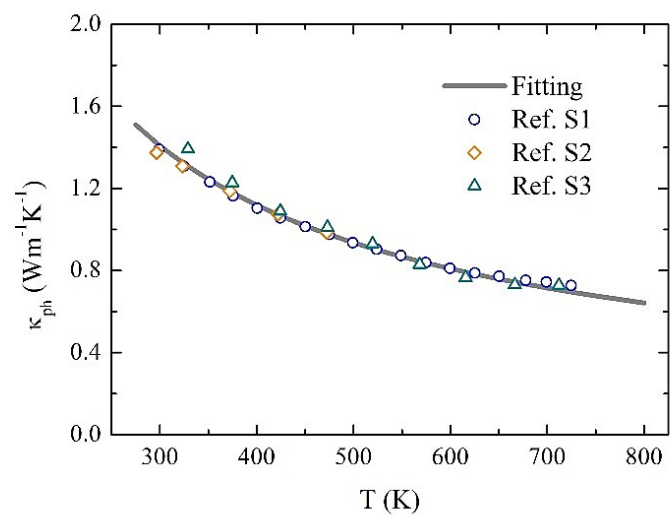

Figure S6. The fitted lattice thermal conductivity as a function of temperature for  $\text{Mg}_3\text{Sb}_2$ , and the experimental results[S1,S2,S3] are also shown for comparison.

## References

---

- [S1] L. Song, J. Zhang, B. B. Iversen, Simultaneous improvement of power factor and thermal conductivity *via* Ag doping in *p*-type  $\text{Mg}_3\text{Sb}_2$  thermoelectric materials, *J. Mater. Chem. A* 5 (2017) 4932–4939.
- [S2] Z. Ren, J. Shuai, J. Mao, Q. Zhu, S. Song, Y. Ni, S. Chen, Significantly enhanced thermoelectric properties of *p*-type  $\text{Mg}_3\text{Sb}_2$  *via* co-doping of Na and Zn, *Acta Mater.* 143 (2018) 265–271.
- [S3] H. Tamaki, H. K. Sato, T. Kanno, Isotropic conduction network and defect chemistry in  $\text{Mg}_{3+x}\text{Sb}_2$ -based layered Zintl compounds with high thermoelectric performance, *Adv. Mater.* 28 (2016) 10182–10187.
